# Supplementary material for: Computational development of a phase-sensitive membrane raft probe
Source: Royal Society of Chemistry journal article supplement (doi:10.1039/d2cp00431c), 2022-01-01
Supplement: d2cp00431c1.pdf [file d2cp00431c1.pdf]

## **Computational development of a phase-sensitive membrane raft probe**

Max Winslow and David Robinson\*

[\\*david.robinson@ntu.ac.uk](mailto:david.robinson@ntu.ac.uk)

*Department of Chemistry and Forensics, School of Science and Technology, Nottingham Trent University, Clifton Lane, Nottingham, NG11 8NS, United Kingdom.*

**Molecular dynamics simulations – equilibration procedure**

Equilibration was performed over six steps as described in section 2.2 of the main text. Restraints were applied with the following force constants (in kcal mol<sup>-1</sup> Å<sup>-2</sup>) to help keep water molecules from the hydrophobic core.

| Selection                        | Step 1 | Step 2 | Step 3 | Step 4 | Step 5 | Step 6 |
|----------------------------------|--------|--------|--------|--------|--------|--------|
| Carbon atoms<br>(DPH derivative) | 10.0   | 5.0    | 2.5    | 1.0    | 0.5    | 0.1    |
| Water                            | 2.5    | 2.5    | 1.0    | 0.5    | 0.1    | 0.0    |
| Lipid tails                      | 2.5    | 2.5    | 1.0    | 0.5    | 0.1    | 0.0    |
| Lipid heads                      | 2.5    | 2.5    | 1.0    | 0.5    | 0.1    | 0.0    |
| Ions                             | 10     | 0.0    | 0.0    | 0.0    | 0.0    | 0.0    |

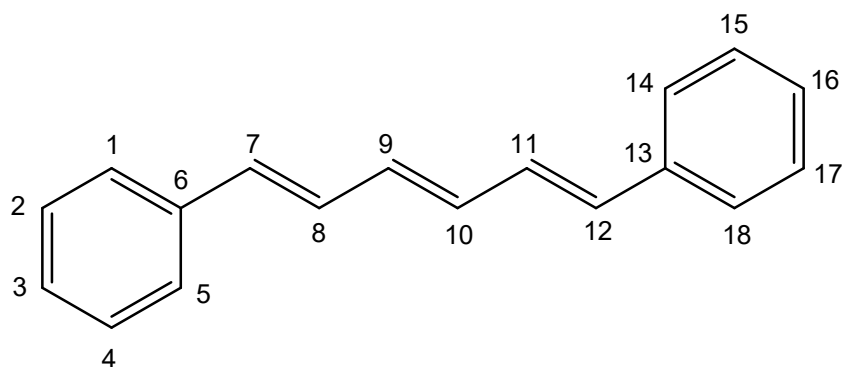

**Figure S1.** Atom numbering scheme used to identify dihedral angles for 1,6-diphenylhexatriene and derivatives.

|                         | Dihedral angle / ° |             |             |
|-------------------------|--------------------|-------------|-------------|
|                         | C9-C10-C11-C12     | C1-C6-C7-C8 | C6-C7-C8-C9 |
| S <sub>0</sub>          | 0.4                | 37.0        | 1.4         |
| S <sub>1</sub>          | 0.8                | 16.1        | 6.7         |
| MECI                    | 3.3                | 2.4         | 42.0        |
| AIMD (S <sub>1</sub> )  | 3.6 ± 2.6          | 17 ± 6      | 6.8 ± 4.4   |
| QM/MM (S <sub>1</sub> ) | 31.6 ± 12.3        | 33.5 ± 10.6 | 18.1 ± 8.4  |

**Table S1.** Selected geometrical parameters for 1,3-dimethyl-1,6-diphenyl-1,3,5-hexatriene.

|                         | Dihedral angle / ° |             |             |
|-------------------------|--------------------|-------------|-------------|
|                         | C8-C9-C10-C11      | C1-C6-C7-C8 | C6-C7-C8-C9 |
| S <sub>0</sub>          | 0.3                | 33.0        | 0.7         |
| S <sub>1</sub>          | 1.2                | 16.7        | 0.5         |
| MECI                    | 11.0               | 48.2        | 44.0        |
| AIMD (S <sub>1</sub> )  | 5.5 ± 3.9          | 15.5 ± 5.7  | 5.2 ± 4.1   |
| QM/MM (S <sub>1</sub> ) | 22.9 ± 10.8        | 34.1 ± 21.8 | 22.4 ± 9.5  |

**Table S2.** Selected geometrical parameters for 1,4-dimethyl-1,6-diphenyl-1,3,5-hexatriene.

**SUPPORTING INFORMATION**

|                         | Dihedral angle / ° |             |                 |                 |
|-------------------------|--------------------|-------------|-----------------|-----------------|
|                         | C7-C8-C9-C10       | C1-C6-C7-C8 | C11-C12-C13-C14 | C10-C11-C12-C13 |
| S <sub>0</sub>          | 1.3                | 31.4        | 39.6            | 1.9             |
| S <sub>1</sub>          | 1.9                | 17.1        | 15.2            | 6.2             |
| MECI                    | 1.8                | 28.8        | 48.0            | 36.6            |
| AIMD (S <sub>1</sub> )  | 4.4 ± 3.1          | 15.5 ± 6    | 13.6 ± 7.7      | 5.8 ± 3.9       |
| QM/MM (S <sub>1</sub> ) | 28.7 ± 10.8        | 46.1 ± 12.1 | 40.6 ± 13.4     | 6.8 ± 4.7       |

**Table S3.** Selected geometrical parameters for 1,5-dimethyl-1,6-diphenyl-1,3,5-hexatriene.

|                         | Dihedral angle / ° |             |             |
|-------------------------|--------------------|-------------|-------------|
|                         | C8-C9-C10-C11      | C6-C7-C8-C9 | C1-C6-C7-C8 |
| S <sub>0</sub>          | 1.4                | 2.6         | 40.5        |
| S <sub>1</sub>          | 3.8                | 12.6        | 18.9        |
| MECI                    | 3.8                | 37.0        | 39.8        |
| AIMD (S <sub>1</sub> )  | 7.3 ± 4.8          | 7.8 ± 5.7   | 19.2 ± 10.2 |
| QM/MM (S <sub>1</sub> ) | 11.9 ± 9.4         | 12.2 ± 8.7  | 52.3 ± 16.6 |

**Table S4.** Selected geometrical parameters for 2,3-dimethyl-1,6-diphenyl-1,3,5-hexatriene.

|                         | Dihedral angle / ° |             |             |
|-------------------------|--------------------|-------------|-------------|
|                         | C11-C12-C13-C14    | C1-C6-C7-C8 | C6-C7-C8-C9 |
| S <sub>0</sub>          | 6.4                | 33.5        | 0.7         |
| S <sub>1</sub>          | 0.9                | 12.3        | 5.8         |
| MECI                    | 13.0               | 4.9         | 45.1        |
| AIMD (S <sub>1</sub> )  | 4 ± 3.3            | 15.2 ± 4.8  | 6 ± 3.4     |
| QM/MM (S <sub>1</sub> ) | 28.2 ± 11          | 61.3 ± 13.8 | 8.6 ± 5.4   |

**Table S5.** Selected geometrical parameters for 2,4-dimethyl-1,6-diphenyl-1,3,5-hexatriene.

**SUPPORTING INFORMATION**

|                         | Dihedral angle / ° |             |             |                 |
|-------------------------|--------------------|-------------|-------------|-----------------|
|                         | C11-C12-C13-C14    | C1-C6-C7-C8 | C6-C7-C8-C9 | C10-C11-C12-C13 |
| S <sub>0</sub>          | 35.5               | 38.3        | 2.3         | 2.3             |
| S <sub>1</sub>          | 12.9               | 14.9        | 7.7         | 7.7             |
| MECI                    | 31.4               | 46.3        | 36.2        | 4.5             |
| AIMD (S <sub>1</sub> )  | 14.4 ± 8.4         | 15 ± 8.5    | 9.6 ± 7.1   | 10.1 ± 6.8      |
| QM/MM (S <sub>1</sub> ) | 30.9 ± 17.5        | 14.2 ± 8.5  | 12.5 ± 7.6  | 9.4 ± 6.5       |

**Table S6.** Selected geometrical parameters for 2,5-dimethyl-1,6-diphenyl-1,3,5-hexatriene.

|                         | Dihedral angle / ° |             |              |
|-------------------------|--------------------|-------------|--------------|
|                         | C10-C11-C12-C13    | C6-C7-C8-C9 | C7-C8-C9-C10 |
| S <sub>0</sub>          | 0.2                | 0.2         | 0.1          |
| S <sub>1</sub>          | 0.2                | 0.2         | 0.6          |
| MECI                    | 4.6                | 85.9        | 61.5         |
| AIMD (S <sub>1</sub> )  | 4.4 ± 3.7          | 5 ± 3.6     | 6.9 ± 4.8    |
| QM/MM (S <sub>1</sub> ) | 13.6 ± 9.9         | 7.7 ± 5.9   | 23.9 ± 17.1  |

**Table S7.** Selected geometrical parameters for 3,4-dimethyl-1,6-diphenyl-1,3,5-hexatriene.

|                         | Dihedral angle / ° |             |               |
|-------------------------|--------------------|-------------|---------------|
|                         | C14-C13-C12-C11    | C1-C6-C7-C8 | C8-C9-C10-C11 |
| S <sub>0</sub>          | 0.0                | 31.3        | 0.1           |
| S <sub>1</sub>          | 0.2                | 14.2        | 0.1           |
| MECI                    | 18.9               | 29.7        | 34.5          |
| AIMD (S <sub>1</sub> )  | 9.7 ± 6.9          | 12.3 ± 8.1  | 4.5 ± 3.4     |
| QM/MM (S <sub>1</sub> ) | 36.2 ± 26.9        | 26 ± 8.2    | 8.3 ± 5.7     |

**Table S8.** Selected geometrical parameters for 1-methyl-1,6-diphenyl-1,3,5-hexatriene.

|                         | Dihedral angle / ° |             |
|-------------------------|--------------------|-------------|
|                         | C1-C6-C7-C8        | C6-C7-C8-C9 |
| S <sub>0</sub>          | 38.2               | 2.1         |
| S <sub>1</sub>          | 14.5               | 6.5         |
| MECI                    | 47.4               | 36.9        |
| AIMD (S <sub>1</sub> )  | 30.0 ± 19.5        | 48.3 ± 27.0 |
| QM/MM (S <sub>1</sub> ) | 19.6 ± 10.2        | 8.8 ± 6.3   |

**Table S9.** Selected geometrical parameters for 2-methyl-1,6-diphenyl-1,3,5-hexatriene.

|                         | Dihedral angle / ° |               |
|-------------------------|--------------------|---------------|
|                         | C10-C11-C12-C13    | C8-C9-C10-C11 |
| S <sub>0</sub>          | 0.0                | 0.0           |
| S <sub>1</sub>          | 0.1                | 1.0           |
| MECI                    | 8.7                | 38.0          |
| AIMD (S <sub>1</sub> )  | 4.9 ± 3.7          | 4.5 ± 3.2     |
| QM/MM (S <sub>1</sub> ) | 6.9 ± 5.1          | 27.9 ± 10.6   |

**Table S10.** Selected geometrical parameters for 3-methyl-1,6-diphenyl-1,3,5-hexatriene.

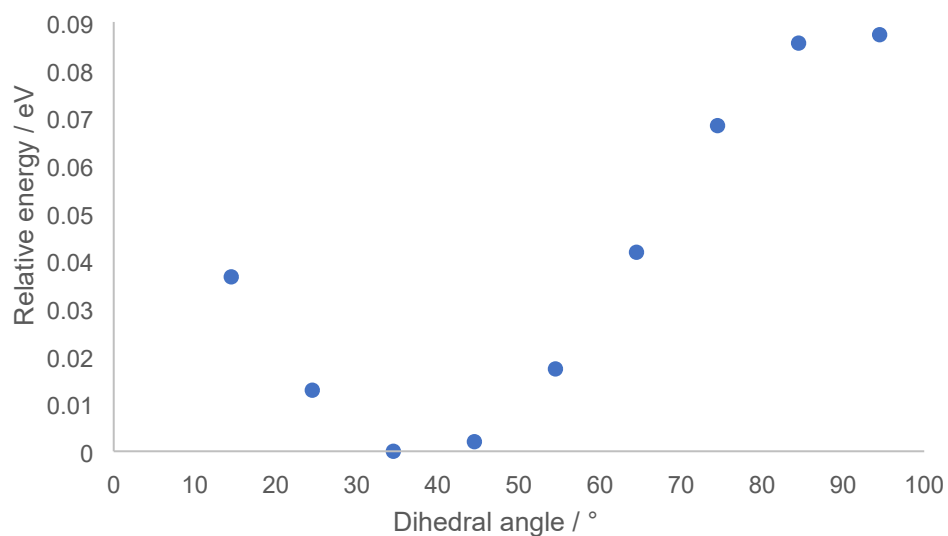

**Figure S2.** Potential energy scan of the S<sub>0</sub> state of **2Me** as a function of the C1-C6-C7-C8 dihedral angle (see Figure S1 for atom numbering) using BHHLYP/6-31G(d,p).

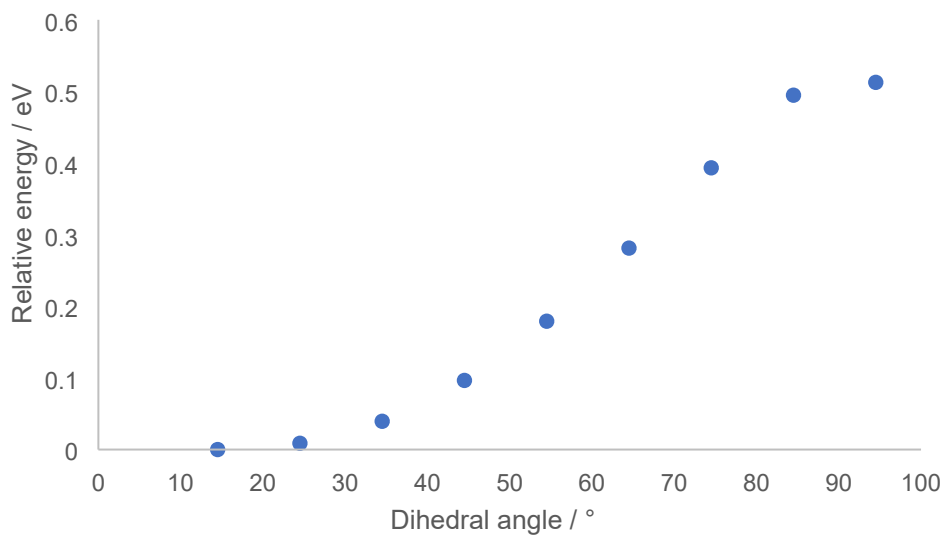

**Figure S3.** Potential energy scan of the S<sub>1</sub> state of **2Me** as a function of the C1-C6-C7-C8 dihedral angle (see Figure S1 for atom numbering) using BHHLYP/6-31G(d,p).

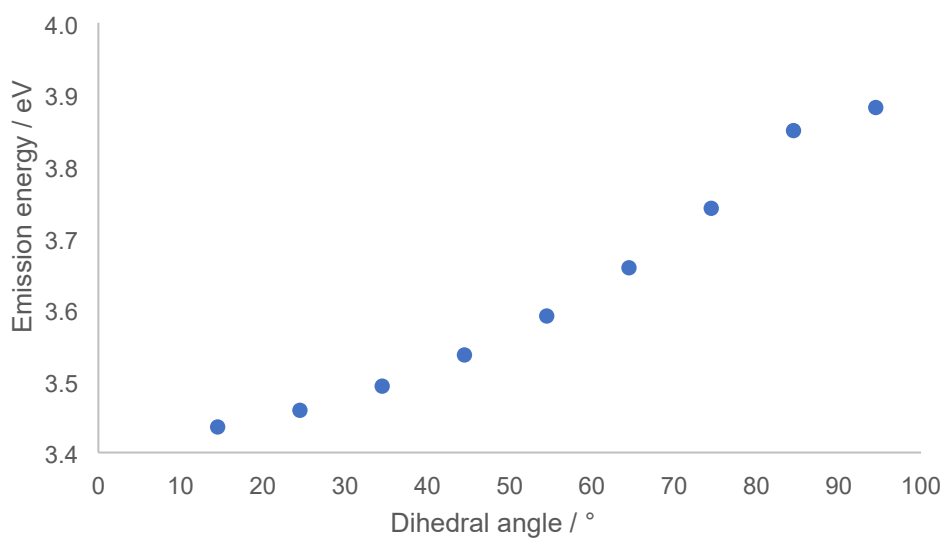

**Figure S4.** Calculated emission energy of **2Me** as a function of the C1-C6-C7-C8 dihedral angle (see Figure S1 for atom numbering) using BHHLYP/6-31G(d,p).

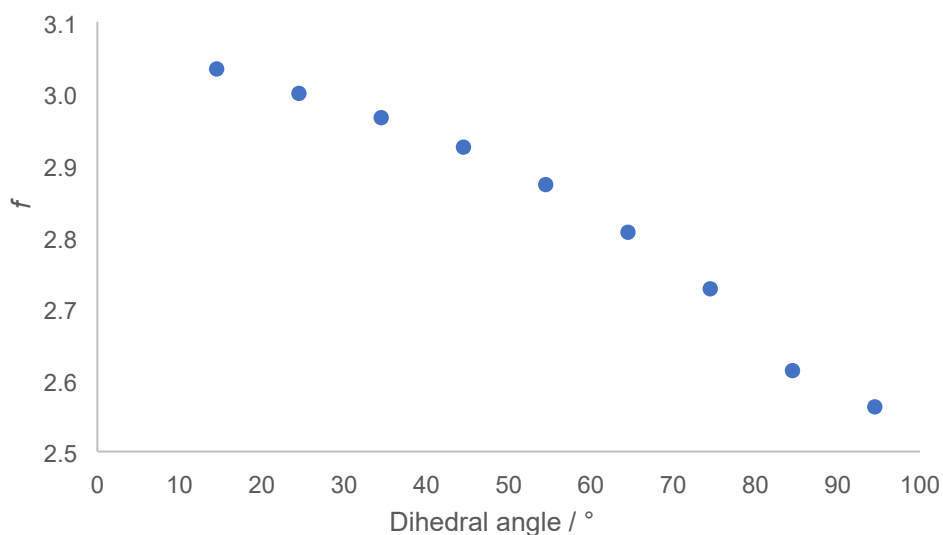

**Figure S5.** Oscillator strength ( $f$ ) of **2Me** as a function of the C1-C6-C7-C8 dihedral angle (see Figure S1 for atom numbering) taken from the  $S_1$  potential energy scan for the  $S_1 \leftarrow S_0$  transition (which approximates emission) using BHHLYP/6-31G(d,p).

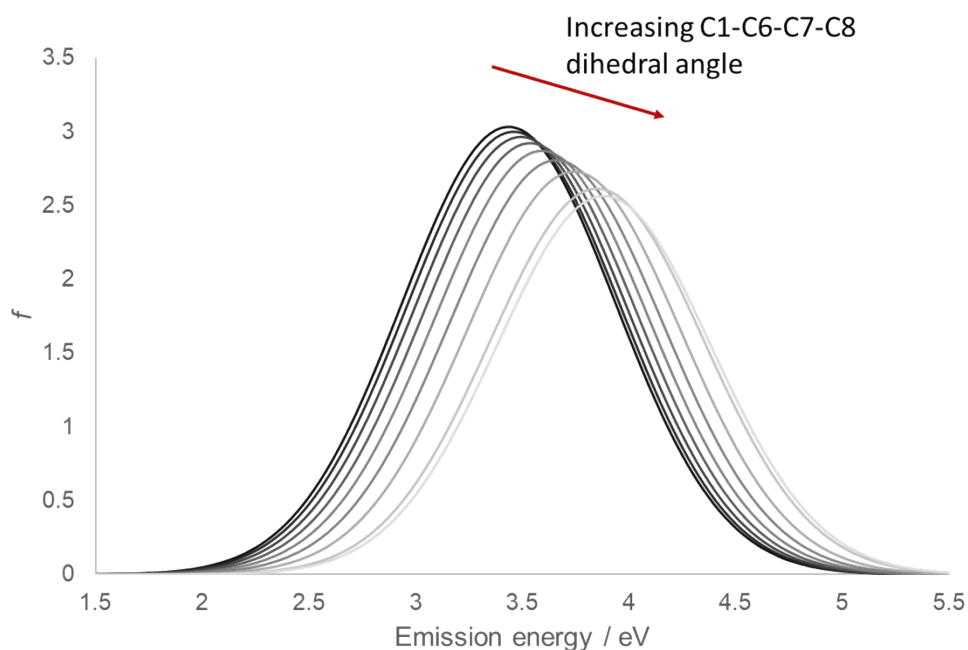

**Figure S6.** Simulated emission spectra for **2Me** as the C1-C6-C7-C8 dihedral angle increases from  $\sim 10^\circ$  to  $\sim 90^\circ$ . The gaussian function was fitted using a broadening factor of

0.5 eV in the following equation:  $f(x) = ae^{-\frac{(x-b)^2}{2c^2}}$ , where  $a$  is the oscillator strength (Figure S5),  $b$  is the emission energy (Figure S4) and  $c$  is the broadening factor.



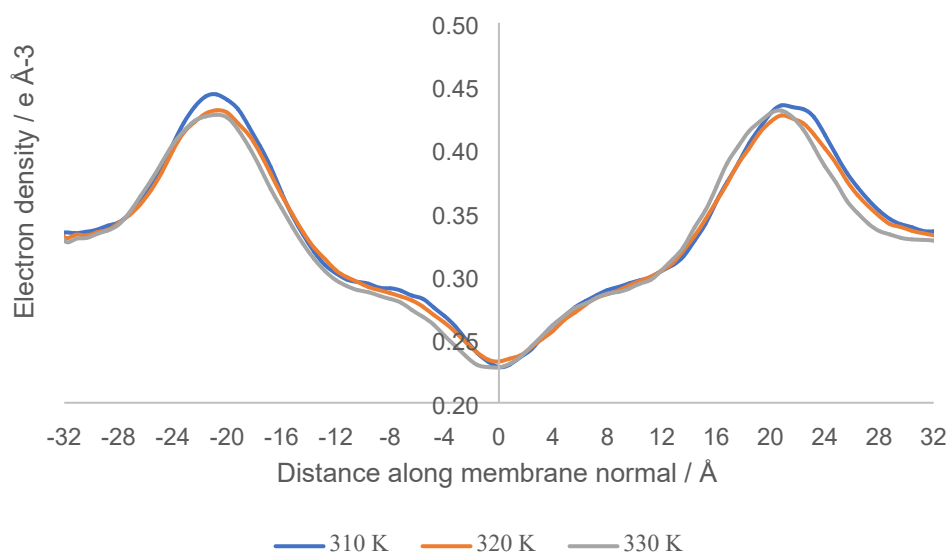

**Figure S7.** Calculated electron density profile from the non-raft MD simulation.

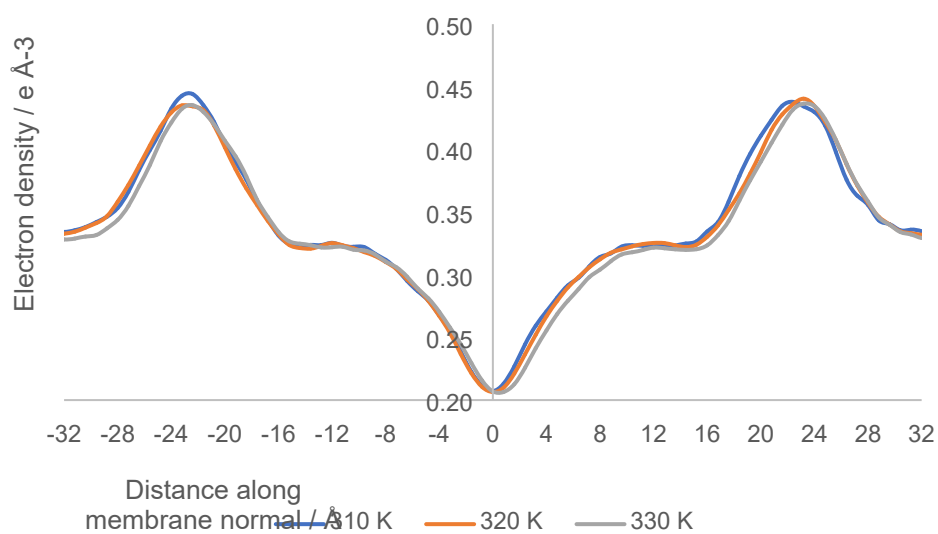

**Figure S8.** Calculated electron density profile from the raft MD simulation.

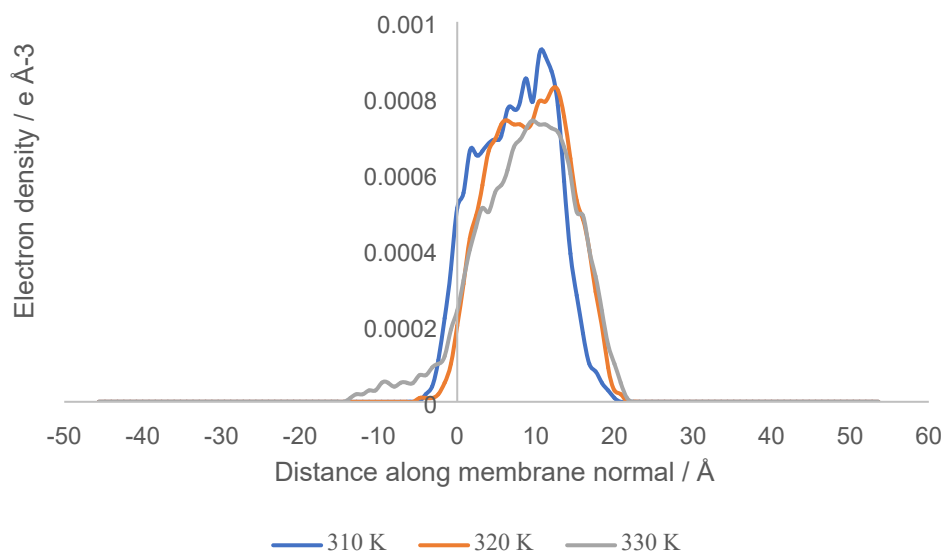

**Figure S9.** Calculated electron density profile of **2Me** from the non-raft MD simulation

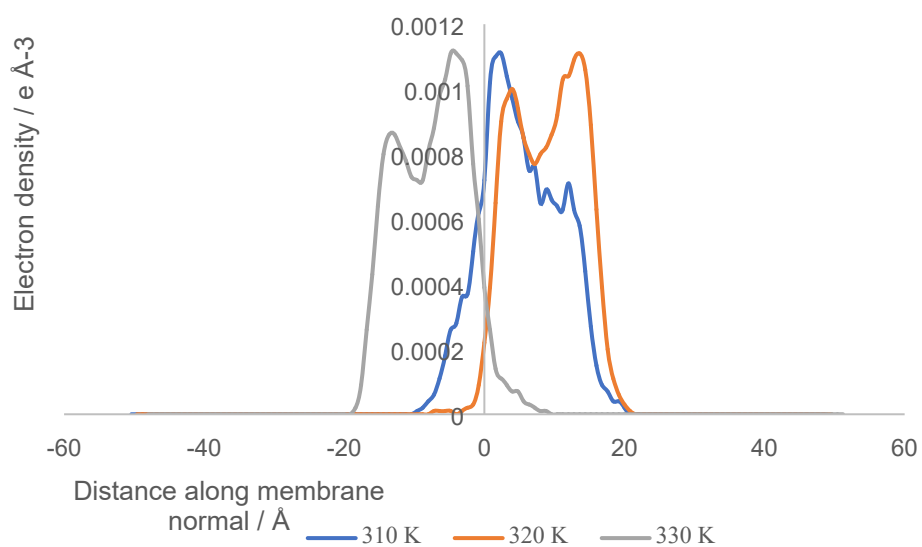

**Figure S10.** Calculated electron density profile of **2Me** from the raft MD simulation.

## SUPPORTING INFORMATION

Full Cartesian coordinates for the MECI geometries found.

40

1, 3Me

|   |               |               |               |
|---|---------------|---------------|---------------|
| C | 6.4432646039  | -0.8366438909 | 0.0295419657  |
| C | 6.7045921272  | 0.2174245525  | 0.8974106558  |
| C | 5.7054623403  | 1.1102450918  | 1.2442793744  |
| C | 4.4343284131  | 0.9518709845  | 0.7275319669  |
| C | 4.1503708566  | -0.1092108970 | -0.1361280843 |
| C | 5.1779458317  | -0.9978571582 | -0.4874815953 |
| H | 4.9860044095  | -1.8202717882 | -1.1530420653 |
| H | 7.2274116466  | -1.5253405449 | -0.2349950131 |
| H | 3.6194852165  | 1.6158550574  | 0.9505513037  |
| H | 7.6968632278  | 0.3393429198  | 1.3000108616  |
| H | 5.9177004593  | 1.9271677208  | 1.9126832636  |
| C | 2.7709009189  | -0.2761256548 | -0.5875564699 |
| C | 1.7783615788  | 0.6601988399  | -0.2583053629 |
| C | 0.4529041506  | 0.1823317802  | 0.1414666886  |
| C | -0.6946137025 | 0.4594782450  | -0.5176211406 |
| C | -2.0361931918 | 0.1536953437  | -0.0984817596 |
| C | -3.1437765048 | 0.5087406819  | -0.7653829634 |
| C | 2.4952382153  | -1.4640709500 | -1.4655742939 |
| C | 0.4784072236  | -0.5710931971 | 1.4488454206  |
| H | -0.6184163996 | 1.0121537089  | -1.4441096858 |
| H | -2.1555644340 | -0.4013239338 | 0.8188333563  |
| C | -4.5203986281 | 0.2091939535  | -0.3821134623 |
| H | -3.0318879391 | 1.0989504151  | -1.6648766129 |
| C | -4.8565048606 | -0.7310632445 | 0.5978761204  |
| C | -5.5710799844 | 0.8810792167  | -1.0124401662 |
| C | -6.8902540426 | 0.6471624231  | -0.6658709721 |
| C | -7.2014386795 | -0.2734270066 | 0.3210395187  |
| C | -6.1728260539 | -0.9627923218 | 0.9468056952  |
| H | -4.0786689462 | -1.2974230635 | 1.0826801471  |
| H | -6.3985333526 | -1.6934199501 | 1.7072793456  |
| H | -7.6770571964 | 1.1878098909  | -1.1675926334 |
| H | -8.2273480421 | -0.4574205797 | 0.5944127546  |
| H | -5.3421220493 | 1.6044109109  | -1.7797744312 |
| H | 3.1422451334  | -1.5003083187 | -2.3385741071 |
| H | 1.4578242047  | -1.4651794471 | -1.7689086116 |
| H | 2.6915343321  | -2.3672669834 | -0.8883639717 |
| H | 0.9742270796  | 0.0319488451  | 2.2049042998  |
| H | 1.0518883454  | -1.4938307739 | 1.3539959175  |
| H | -0.5042728736 | -0.8382830385 | 1.8139214521  |
| H | 1.6467581265  | 0.8547452699  | -1.3645091120 |

40

1, 4Me

|   |              |               |               |
|---|--------------|---------------|---------------|
| C | 6.4198453879 | -0.3308020437 | -0.6536849686 |
| C | 6.2770575797 | 0.7792323769  | -1.4670946336 |
| C | 4.9933452021 | 1.2248444308  | -1.7479643912 |
| C | 3.8904173486 | 0.5753533236  | -1.2350489609 |
| C | 4.0118283545 | -0.5619352146 | -0.4127755745 |
| C | 5.3175703437 | -0.9836431649 | -0.1289502226 |
| H | 5.4805298796 | -1.8401487558 | 0.5038325951  |
| H | 7.4065133506 | -0.6952562507 | -0.4128705282 |
| H | 2.9032198567 | 0.9288125038  | -1.4905798566 |
| H | 7.1378486636 | 1.2840594816  | -1.8718964519 |
| H | 4.8474482000 | 2.0911199113  | -2.3753450426 |
| C | 2.8044607033 | -1.2410305543 | 0.0301991213  |

## SUPPORTING INFORMATION

|   |               |               |               |
|---|---------------|---------------|---------------|
| C | 1.7730900058  | -0.5227821754 | 0.6228336658  |
| C | 0.3926173886  | -0.7106753557 | 0.3072175027  |
| C | -0.6574973258 | -0.0387674827 | 0.8527854659  |
| C | -1.9483352328 | -0.2080280776 | 0.2203556208  |
| C | -3.0508771958 | 0.4861830193  | 0.5407629719  |
| C | 3.0383375102  | -1.8944227759 | 1.4946748860  |
| H | 1.9656146724  | 0.2024182248  | 1.4292423591  |
| H | 0.2181556383  | -1.3826613804 | -0.5160714867 |
| C | -0.5529614882 | 0.8889163801  | 2.0262241995  |
| H | -1.9781108265 | -0.9192063587 | -0.5888322147 |
| C | -4.3512872095 | 0.4231277776  | -0.1119308292 |
| H | -2.9959787431 | 1.1878799000  | 1.3581347913  |
| C | -4.5977777842 | -0.3308235327 | -1.2631070639 |
| C | -5.3979495649 | 1.1735607509  | 0.4253632129  |
| C | -6.6523815409 | 1.1691534714  | -0.1570119962 |
| C | -6.8815846722 | 0.4143385750  | -1.2951944613 |
| C | -5.8492786621 | -0.3340121016 | -1.8456280221 |
| H | -3.8071961173 | -0.9072310199 | -1.7128025470 |
| H | -6.0220133978 | -0.9157265791 | -2.7361139263 |
| H | -7.4464347437 | 1.7561378131  | 0.2739344721  |
| H | -7.8558306458 | 0.4106995094  | -1.7552703258 |
| H | -5.2199132098 | 1.7651733715  | 1.3095010661  |
| H | 3.5724668847  | -1.2690936261 | 2.2148485218  |
| H | 3.6569006814  | -2.7321504950 | 1.1844085011  |
| H | 2.1692965471  | -2.3383141433 | 1.9697151461  |
| H | -0.7698378286 | 1.9103604933  | 1.7244196917  |
| H | 0.4239232342  | 0.8735634931  | 2.4853499741  |
| H | -1.2844662122 | 0.6132329010  | 2.7805655185  |

40

1, 5Me

|   |               |               |               |
|---|---------------|---------------|---------------|
| C | 6.6490150210  | -0.0871401792 | 0.0718863424  |
| C | 6.6991433206  | 1.1398223837  | -0.5682934795 |
| C | 5.5231057313  | 1.7341122718  | -0.9990177513 |
| C | 4.3089345930  | 1.1096214349  | -0.7850607948 |
| C | 4.2390179099  | -0.1234633768 | -0.1317587109 |
| C | 5.4343799909  | -0.7156966655 | 0.2797712098  |
| H | 5.4210033925  | -1.6674316322 | 0.7821760011  |
| H | 7.5566127997  | -0.5591382960 | 0.4102117950  |
| H | 3.4089092094  | 1.5674753467  | -1.1578896454 |
| H | 7.6462971796  | 1.6242839895  | -0.7384139474 |
| H | 5.5513577236  | 2.6808293359  | -1.5126281643 |
| C | 2.9438305084  | -0.7952348393 | 0.0982828606  |
| C | 1.8209106771  | -0.0605890690 | 0.2561925523  |
| C | 0.4927249583  | -0.5621262159 | 0.4346569416  |
| C | -0.5840762277 | 0.2467588843  | 0.5509163939  |
| C | -1.9511620331 | -0.1957722199 | 0.6705495151  |
| C | -2.9396009298 | 0.7706727262  | 0.9197047431  |
| H | 0.3502184329  | -1.6289135743 | 0.4635474554  |
| H | -0.4728419724 | 1.3167054816  | 0.5478562775  |
| C | -4.2654494516 | 0.6311084768  | 0.2968397218  |
| C | -4.4034688199 | 0.3522986955  | -1.0711616160 |
| C | -5.4507625439 | 0.8529739807  | 1.0121434781  |
| C | -6.6867069321 | 0.8005511011  | 0.4001720056  |
| C | -6.8028903186 | 0.5254059300  | -0.9550269288 |
| C | -5.6451818406 | 0.3082186032  | -1.6807467045 |
| H | -3.5193669447 | 0.1961172834  | -1.6696765899 |
| H | -5.7030249272 | 0.0973194780  | -2.7379257051 |
| H | -7.5728399925 | 0.9785855816  | 0.9903816134  |

## SUPPORTING INFORMATION

|   |               |               |               |
|---|---------------|---------------|---------------|
| H | -7.7686925008 | 0.4888250360  | -1.4308144453 |
| H | -5.3871825125 | 1.0878554786  | 2.0630642749  |
| C | 2.9650944428  | -2.2951605131 | 0.1537250904  |
| H | -3.1116918209 | 0.1675001111  | 1.8749379772  |
| H | 1.9095767004  | 1.0134927794  | 0.2579159845  |
| C | -2.2101452813 | -1.6837315068 | 0.6157571063  |
| H | 3.5267568915  | -2.6984187550 | -0.6839858968 |
| H | 1.9762370370  | -2.7318940326 | 0.1388592292  |
| H | 3.4562436919  | -2.6367851561 | 1.0624181567  |
| H | -1.9355038984 | -2.0521298951 | -0.3708164220 |
| H | -3.2609430077 | -1.8855357613 | 0.7698651497  |
| H | -1.6197637430 | -2.2362879705 | 1.3427782050  |

40  
2, 3Me

|   |               |               |               |
|---|---------------|---------------|---------------|
| C | 6.6490150210  | -0.0871401792 | 0.0718863424  |
| C | 6.6991433206  | 1.1398223837  | -0.5682934795 |
| C | 5.5231057313  | 1.7341122718  | -0.9990177513 |
| C | 4.3089345930  | 1.1096214349  | -0.7850607948 |
| C | 4.2390179099  | -0.1234633768 | -0.1317587109 |
| C | 5.4343799909  | -0.7156966655 | 0.2797712098  |
| H | 5.4210033925  | -1.6674316322 | 0.7821760011  |
| H | 7.5566127997  | -0.5591382960 | 0.4102117950  |
| H | 3.4089092094  | 1.5674753467  | -1.1578896454 |
| H | 7.6462971796  | 1.6242839895  | -0.7384139474 |
| H | 5.5513577236  | 2.6808293359  | -1.5126281643 |
| C | 2.9438305084  | -0.7952348393 | 0.0982828606  |
| C | 1.8209106771  | -0.0605890690 | 0.2561925523  |
| C | 0.4927249583  | -0.5621262159 | 0.4346569416  |
| C | -0.5840762277 | 0.2467588843  | 0.5509163939  |
| C | -1.9511620331 | -0.1957722199 | 0.6705495151  |
| C | -2.9396009298 | 0.7706727262  | 0.9197047431  |
| H | 0.3502184329  | -1.6289135743 | 0.4635474554  |
| H | -0.4728419724 | 1.3167054816  | 0.5478562775  |
| C | -4.2654494516 | 0.6311084768  | 0.2968397218  |
| C | -4.4034688199 | 0.3522986955  | -1.0711616160 |
| C | -5.4507625439 | 0.8529739807  | 1.0121434781  |
| C | -6.6867069321 | 0.8005511011  | 0.4001720056  |
| C | -6.8028903186 | 0.5254059300  | -0.9550269288 |
| C | -5.6451818406 | 0.3082186032  | -1.6807467045 |
| H | -3.5193669447 | 0.1961172834  | -1.6696765899 |
| H | -5.7030249272 | 0.0973194780  | -2.7379257051 |
| H | -7.5728399925 | 0.9785855816  | 0.9903816134  |
| H | -7.7686925008 | 0.4888250360  | -1.4308144453 |
| H | -5.3871825125 | 1.0878554786  | 2.0630642749  |
| C | 2.9650944428  | -2.2951605131 | 0.1537250904  |
| H | -3.1116918209 | 0.1675001111  | 1.8749379772  |
| H | 1.9095767004  | 1.0134927794  | 0.2579159845  |
| C | -2.2101452813 | -1.6837315068 | 0.6157571063  |
| H | 3.5267568915  | -2.6984187550 | -0.6839858968 |
| H | 1.9762370370  | -2.7318940326 | 0.1388592292  |
| H | 3.4562436919  | -2.6367851561 | 1.0624181567  |
| H | -1.9355038984 | -2.0521298951 | -0.3708164220 |
| H | -3.2609430077 | -1.8855357613 | 0.7698651497  |
| H | -1.6197637430 | -2.2362879705 | 1.3427782050  |

40

## SUPPORTING INFORMATION

2, 4Me

|   |               |               |               |
|---|---------------|---------------|---------------|
| C | 5.9802848737  | 0.4643223746  | 1.4016003194  |
| C | 5.7025032782  | 1.8237982389  | 1.4456264854  |
| C | 4.4624077913  | 2.3102794000  | 1.0520338354  |
| C | 3.4901411508  | 1.4374779537  | 0.6118978975  |
| C | 3.7607390745  | 0.0670838338  | 0.5562418715  |
| C | 5.0099724800  | -0.4120321135 | 0.9627511972  |
| H | 5.2072377458  | -1.4715914877 | 0.9227360328  |
| H | 6.9449435650  | 0.0990857976  | 1.7111303819  |
| H | 2.5109371824  | 1.7602875117  | 0.3059485320  |
| H | 6.4577340721  | 2.5093483482  | 1.7940901023  |
| H | 4.2620584005  | 3.3676285827  | 1.0942388295  |
| C | 2.7769306890  | -0.8530646638 | 0.0373231572  |
| C | 1.4760751226  | -0.5491262519 | -0.3139485619 |
| C | 0.8462458318  | -1.0055051447 | -1.5290668231 |
| C | -0.4678690308 | -0.9568927179 | -1.8388008352 |
| C | -1.3980364409 | -0.2595766612 | -0.9780143414 |
| C | -2.7347088583 | -0.3428351404 | -1.0198922806 |
| H | 1.5046295583  | -1.4051696445 | -2.2940920933 |
| C | -0.9797097952 | -1.5834673089 | -3.1023299462 |
| C | -3.6772343522 | 0.4239074745  | -0.2079782273 |
| C | -3.3086037042 | 1.5447729779  | 0.5425421008  |
| C | -5.0178021719 | 0.0342382500  | -0.1713052634 |
| C | -5.9475135425 | 0.7180709684  | 0.5917774738  |
| C | -5.5615552111 | 1.8179539056  | 1.3397508957  |
| C | -4.2358018186 | 2.2263906710  | 1.3073663590  |
| H | -2.2897502448 | 1.8934117743  | 0.5133460785  |
| H | -3.9250772318 | 3.0889772777  | 1.8752311947  |
| H | -6.9749923964 | 0.3908892291  | 0.6015882502  |
| H | -6.2828867647 | 2.3547043636  | 1.9339533835  |
| H | -5.3280606763 | -0.8234085394 | -0.7476456688 |
| H | 3.1542071587  | -1.8921488742 | 0.0528123637  |
| H | -3.1902883314 | -1.0543500517 | -1.6931186974 |
| C | 0.9992124105  | -1.3858708726 | 0.9979763974  |
| H | -0.9269584592 | 0.4129151205  | -0.2735923210 |
| H | 1.2430962495  | -2.4522460288 | 1.0058624744  |
| H | -0.0745824016 | -1.2736346378 | 0.8994152385  |
| H | 1.2956203520  | -0.9434192939 | 1.9423864680  |
| H | -1.5713776409 | -0.8783870976 | -3.6846852195 |
| H | -1.6243431499 | -2.4401447754 | -2.9014424615 |
| H | -0.1603527046 | -1.9369623310 | -3.7216801502 |

40

2, 5Me

|   |               |               |               |
|---|---------------|---------------|---------------|
| C | 5.9802848737  | 0.4643223746  | 1.4016003194  |
| C | 5.7025032782  | 1.8237982389  | 1.4456264854  |
| C | 4.4624077913  | 2.3102794000  | 1.0520338354  |
| C | 3.4901411508  | 1.4374779537  | 0.6118978975  |
| C | 3.7607390745  | 0.0670838338  | 0.5562418715  |
| C | 5.0099724800  | -0.4120321135 | 0.9627511972  |
| H | 5.2072377458  | -1.4715914877 | 0.9227360328  |
| H | 6.9449435650  | 0.0990857976  | 1.7111303819  |
| H | 2.5109371824  | 1.7602875117  | 0.3059485320  |
| H | 6.4577340721  | 2.5093483482  | 1.7940901023  |
| H | 4.2620584005  | 3.3676285827  | 1.0942388295  |
| C | 2.7769306890  | -0.8530646638 | 0.0373231572  |
| C | 1.4760751226  | -0.5491262519 | -0.3139485619 |
| C | 0.8462458318  | -1.0055051447 | -1.5290668231 |
| C | -0.4678690308 | -0.9568927179 | -1.8388008352 |

## SUPPORTING INFORMATION

|   |               |               |               |
|---|---------------|---------------|---------------|
| C | -1.3980364409 | -0.2595766612 | -0.9780143414 |
| C | -2.7347088583 | -0.3428351404 | -1.0198922806 |
| H | 1.5046295583  | -1.4051696445 | -2.2940920933 |
| C | -0.9797097952 | -1.5834673089 | -3.1023299462 |
| C | -3.6772343522 | 0.4239074745  | -0.2079782273 |
| C | -3.3086037042 | 1.5447729779  | 0.5425421008  |
| C | -5.0178021719 | 0.0342382500  | -0.1713052634 |
| C | -5.9475135425 | 0.7180709684  | 0.5917774738  |
| C | -5.5615552111 | 1.8179539056  | 1.3397508957  |
| C | -4.2358018186 | 2.2263906710  | 1.3073663590  |
| H | -2.2897502448 | 1.8934117743  | 0.5133460785  |
| H | -3.9250772318 | 3.0889772777  | 1.8752311947  |
| H | -6.9749923964 | 0.3908892291  | 0.6015882502  |
| H | -6.2828867647 | 2.3547043636  | 1.9339533835  |
| H | -5.3280606763 | -0.8234085394 | -0.7476456688 |
| H | 3.1542071587  | -1.8921488742 | 0.0528123637  |
| H | -3.1902883314 | -1.0543500517 | -1.6931186974 |
| C | 0.9992124105  | -1.3858708726 | 0.9979763974  |
| H | -0.9269584592 | 0.4129151205  | -0.2735923210 |
| H | 1.2430962495  | -2.4522460288 | 1.0058624744  |
| H | -0.0745824016 | -1.2736346378 | 0.8994152385  |
| H | 1.2956203520  | -0.9434192939 | 1.9423864680  |
| H | -1.5713776409 | -0.8783870976 | -3.6846852195 |
| H | -1.6243431499 | -2.4401447754 | -2.9014424615 |
| H | -0.1603527046 | -1.9369623310 | -3.7216801502 |

40

3, 4Me

|   |               |               |               |
|---|---------------|---------------|---------------|
| C | 5.8994866609  | -1.5078888211 | 0.2410770161  |
| C | 6.1740341032  | -0.7807565896 | 1.3934812508  |
| C | 5.3652173578  | 0.2934935261  | 1.7429288479  |
| C | 4.2865156271  | 0.6378366652  | 0.9550855783  |
| C | 3.9917080327  | -0.0866285017 | -0.2133252313 |
| C | 4.8230981244  | -1.1690123978 | -0.5511306640 |
| H | 4.6102241624  | -1.7332977665 | -1.4456042597 |
| H | 6.5276028265  | -2.3398795698 | -0.0328358990 |
| H | 3.6558212444  | 1.4738530195  | 1.2062887102  |
| H | 7.0136824439  | -1.0493027425 | 2.0133952707  |
| H | 5.5833273101  | 0.8634600970  | 2.6315204937  |
| C | 2.9174620294  | 0.2996517479  | -1.0718440788 |
| C | 1.8711597003  | 1.2592162497  | -0.7740944784 |
| C | 0.8692631651  | 0.3816850288  | -0.2893175328 |
| C | -0.4029234684 | 0.3066666437  | -1.0024585059 |
| C | -1.5904333793 | 0.2570915265  | -0.2848031457 |
| C | -2.8588604594 | 0.3140579806  | -0.8206939545 |
| C | 0.9971616018  | -0.3785891317 | 0.9987725987  |
| C | -0.4215962475 | 0.4577615780  | -2.4946099145 |
| C | -4.0993446974 | 0.1710470788  | -0.0999624324 |
| C | -4.1746652043 | -0.0816867508 | 1.2779764454  |
| C | -5.3065385386 | 0.2928261591  | -0.8016166788 |
| C | -6.5250308305 | 0.1761995971  | -0.1637121569 |
| C | -6.5769464115 | -0.0691321993 | 1.1992418286  |
| C | -5.3935834424 | -0.1972494430 | 1.9127822311  |
| H | -3.2728637213 | -0.1934566772 | 1.8554421472  |
| H | -5.4239284035 | -0.3914664662 | 2.9728031365  |
| H | -7.4367201578 | 0.2763220110  | -0.7301320163 |
| H | -7.5262136970 | -0.1617815428 | 1.7005036097  |
| H | -5.2748788405 | 0.4846488557  | -1.8626126250 |
| H | 2.8883876321  | -0.2244242426 | -2.0237610725 |

## SUPPORTING INFORMATION

|   |               |               |               |
|---|---------------|---------------|---------------|
| H | -2.9606003317 | 0.4756502830  | -1.8814497324 |
| H | 1.5863717985  | 1.9352517792  | -1.5654939622 |
| H | -1.5077495168 | 0.1525092510  | 0.7843453806  |
| H | 2.0181767250  | -0.4371823604 | 1.3469781497  |
| H | 0.5854445073  | -1.3806774906 | 0.9169126293  |
| H | 0.4336589319  | 0.1422768564  | 1.7736049669  |
| H | 0.5542881998  | 0.2592744787  | -2.9217222430 |
| H | -0.7139776384 | 1.4617995248  | -2.8068368735 |
| H | -1.1332242160 | -0.2325704512 | -2.9413986028 |

37

1Me

|   |               |               |               |
|---|---------------|---------------|---------------|
| H | -4.9407358240 | 0.2665997742  | 2.4764487537  |
| C | -5.1738396175 | 0.2059831313  | 1.4273837989  |
| C | -6.4142965912 | -0.2698544522 | 1.0433087913  |
| H | -7.1282241180 | -0.5648333755 | 1.7943966700  |
| C | -6.7378967486 | -0.3645104575 | -0.3000090058 |
| H | -7.7057692822 | -0.7313923531 | -0.5986099131 |
| C | -5.8144594031 | 0.0244534522  | -1.2580922733 |
| H | -6.0664409190 | -0.0249133785 | -2.3039513450 |
| C | -4.5695421049 | 0.4841196430  | -0.8767130128 |
| H | -3.8720487204 | 0.8052916544  | -1.6300644858 |
| C | -4.2211963782 | 0.5720369093  | 0.4739640602  |
| C | -2.8823066370 | 1.0290166777  | 0.8841334038  |
| H | 6.1138946050  | -1.7807493254 | 1.2971923440  |
| C | 5.9387250836  | -0.9820829174 | 0.5932674913  |
| C | 4.6627144777  | -0.4708668700 | 0.4511818117  |
| H | 3.8682220264  | -0.8694097149 | 1.0607405772  |
| C | 4.3892340346  | 0.5640806085  | -0.4504501009 |
| C | 5.4700398157  | 1.0813450433  | -1.1705885852 |
| H | 5.2930465906  | 1.8864196135  | -1.8666521093 |
| C | 6.7488927209  | 0.5743556459  | -1.0245790732 |
| H | 7.5564911550  | 0.9935211335  | -1.6038986157 |
| C | 6.9938915494  | -0.4682118173 | -0.1461038906 |
| H | 7.9880303926  | -0.8682235648 | -0.0324615387 |
| C | -1.8257665832 | 0.8062258120  | 0.0643835439  |
| C | -0.4606643204 | 1.1099910207  | 0.3381614494  |
| C | 0.5446312184  | 0.9369237716  | -0.6075985080 |
| C | 1.9008441259  | 0.5298215475  | -0.3220170091 |
| C | 3.0563551374  | 1.1209444829  | -0.6559749812 |
| C | -2.7764508928 | 1.6895412421  | 2.2253496723  |
| H | -1.9718077641 | 0.2991875340  | -0.8716931013 |
| H | -0.2793268632 | 1.5884301303  | 1.3085218509  |
| H | 0.5816698759  | 2.0879159647  | -0.5136928599 |
| H | 1.9515577454  | -0.4524094607 | 0.1323956965  |
| H | 3.0242324133  | 2.0650308512  | -1.1807296601 |
| H | -1.8323462430 | 2.1941611007  | 2.3725253426  |
| H | -2.8811514720 | 0.9526483736  | 3.0194057282  |
| H | -3.5791268843 | 2.4100444699  | 2.3512546843  |

37

2Me

|   |              |              |               |
|---|--------------|--------------|---------------|
| H | 8.7645276421 | 1.6188889431 | -3.9385333266 |
| C | 8.1022183559 | 1.2110832698 | -3.1908438340 |
| C | 6.7391934303 | 1.3453810742 | -3.3567181574 |
| H | 6.3554215475 | 1.8392195200 | -4.2355545419 |
| C | 5.8305655543 | 0.8299570228 | -2.4219344938 |



## SUPPORTING INFORMATION

|   |               |               |               |
|---|---------------|---------------|---------------|
| C | 4.3771077561  | 0.8687966297  | -2.6466819188 |
| C | 6.3802791153  | 0.1846643447  | -1.3042237573 |
| H | 5.7224186663  | -0.2424690009 | -0.5624741352 |
| C | 7.7485822468  | 0.0456774802  | -1.1479616593 |
| H | 8.1268648805  | -0.4705098075 | -0.2785451698 |
| C | 8.6275382106  | 0.5579145826  | -2.0851288383 |
| H | 9.6918054862  | 0.4464188527  | -1.9632787717 |
| H | -1.8420548560 | -1.9283470905 | -0.8888183478 |
| C | -2.4957977321 | -1.5440295981 | -0.1245642376 |
| C | -3.6769401355 | -2.2041363155 | 0.1464719798  |
| H | -3.9317980166 | -3.0925353447 | -0.4071658644 |
| C | -4.5342863855 | -1.7306513010 | 1.1311894368  |
| H | -5.4545834408 | -2.2503040487 | 1.3411556470  |
| C | -4.2020491189 | -0.5901181368 | 1.8432036090  |
| H | -4.8616565766 | -0.2179493538 | 2.6093456346  |
| C | -3.0181527988 | 0.0714190875  | 1.5722626443  |
| H | -2.7603070680 | 0.9583384054  | 2.1290589285  |
| C | -2.1453917874 | -0.3919588372 | 0.5864077725  |
| C | 3.5157871439  | 1.2204979314  | -1.5951947418 |
| C | 2.2494470713  | 0.5355713175  | -1.5072453178 |
| C | 1.2528613121  | 0.8250743891  | -0.6419872377 |
| C | 0.0509444777  | 0.0563288108  | -0.5439036858 |
| C | -0.9074378983 | 0.3356258904  | 0.3568084082  |
| H | 4.2513967397  | 1.9662923581  | -2.9440546143 |
| C | 3.7822136934  | 2.3272781645  | -0.6016039174 |
| H | 2.1517727877  | -0.2805545318 | -2.2011924378 |
| H | 1.3497067120  | 1.6607603372  | 0.0353117635  |
| H | -0.0460665876 | -0.7809991998 | -1.2162246746 |
| H | -0.7538380630 | 1.1910114068  | 1.0000317362  |
| H | 4.7409683343  | 2.7854698838  | -0.8009196651 |
| H | 3.8096287432  | 1.9020281362  | 0.3995409599  |
| H | 3.0033320584  | 3.0861145251  | -0.6079337730 |

37

3Me

|   |               |               |               |
|---|---------------|---------------|---------------|
| H | -6.4725048894 | 1.9359905685  | -2.9986289370 |
| C | -6.7100974118 | 0.9306409591  | -2.6890541259 |
| C | -8.0026930495 | 0.4582480727  | -2.8190321278 |
| H | -8.7694312298 | 1.0943331494  | -3.2278173129 |
| C | -8.3061587478 | -0.8327039855 | -2.4206086169 |
| H | -9.3119695864 | -1.2047094889 | -2.5207244224 |
| C | -7.3158215603 | -1.6485380319 | -1.8888481541 |
| H | -7.5538001591 | -2.6503246212 | -1.5732370995 |
| C | -6.0253290532 | -1.1799856874 | -1.7622381862 |
| H | -5.2658539368 | -1.8192439946 | -1.3471118040 |
| C | -5.7023092983 | 0.1196937123  | -2.1648944425 |
| C | -4.3559045392 | 0.6564530539  | -2.0757138062 |
| H | 4.4064728454  | -0.8507805972 | -4.9195856489 |
| C | 4.3241414087  | -0.7219287372 | -3.8514822107 |
| C | 3.0830832156  | -0.4914740707 | -3.2896752252 |
| H | 2.2210887081  | -0.4329117229 | -3.9339484641 |
| C | 2.9279123431  | -0.3199090856 | -1.9088017619 |
| C | 1.6401167765  | -0.0847949172 | -1.2632449342 |
| C | 4.0884030271  | -0.3664134455 | -1.1305522421 |
| H | 4.0036642585  | -0.2345162726 | -0.0627968106 |
| C | 5.3320353823  | -0.5925612865 | -1.6928397352 |
| H | 6.2032161904  | -0.6292808179 | -1.0576901769 |
| C | 5.4615761319  | -0.7771728353 | -3.0593199977 |
| H | 6.4283981147  | -0.9556333359 | -3.4999914248 |

## SUPPORTING INFORMATION

|   |               |               |               |
|---|---------------|---------------|---------------|
| C | -3.2552928628 | -0.0059158282 | -1.6842681494 |
| C | -1.9128427431 | 0.5282729082  | -1.7019059704 |
| C | -0.8819748890 | -0.2756868050 | -1.1976515381 |
| C | 0.4361947721  | -0.3138009646 | -1.8055536474 |
| H | -4.2617181356 | 1.6856759025  | -2.3862965115 |
| H | 1.6911126740  | 0.2357043861  | -0.2321409024 |
| H | -3.2938816720 | -1.0288185358 | -1.3584742424 |
| C | -1.7148887259 | 1.9336790488  | -2.2031754677 |
| H | -0.7691661822 | 0.5597809055  | -0.4244866272 |
| H | 0.4101104504  | -0.6935847382 | -2.8206379276 |
| H | -2.4457890006 | 2.6477161450  | -1.8349008195 |
| H | -1.8131412356 | 1.8949639712  | -3.2888917822 |
| H | -0.7142579886 | 2.2737580229  | -1.9763049461 |

## SUPPORTING INFORMATION

Force-fields used for the probe molecules. In each case, the force-fields were initially generated by CGenFF and modified according to the main text. These topologies and parameters should follow the CGenFF topologies and parameters when used in a simulation.

### 1,3Me

```
RESI AIE          0.000
GROUP            ! CHARGE
ATOM C1          CG2R61 -0.115
ATOM C2          CG2R61 -0.115
ATOM C3          CG2R61 -0.115
ATOM C4          CG2R61 -0.115
ATOM C5          CG2R61 -0.004
ATOM C6          CG2R61 -0.115
ATOM H1          HGR61  0.115
ATOM H2          HGR61  0.115
ATOM H3          HGR61  0.115
ATOM H4          HGR61  0.115
ATOM H5          HGR61  0.115
ATOM C7          CG2DC1  0.002
ATOM C8          CG2DC1 -0.140
ATOM C9          CG2DC2 -0.006
ATOM C10         CG2DC2 -0.164
ATOM C11         CG2DC1 -0.131
ATOM C12         CG2DC1 -0.150
ATOM C13         CG331 -0.270
ATOM C14         CG331 -0.270
ATOM H6          HGA4   0.150
ATOM H7          HGA4   0.150
ATOM C15         CG2R61 -0.007
ATOM H8          HGA4   0.150
ATOM C16         CG2R61 -0.115
ATOM C17         CG2R61 -0.115
ATOM C18         CG2R61 -0.115
ATOM C19         CG2R61 -0.115
ATOM C20         CG2R61 -0.115
ATOM H9          HGR61  0.115
ATOM H10         HGR61  0.115
ATOM H11         HGR61  0.115
ATOM H12         HGR61  0.115
ATOM H13         HGR61  0.115
ATOM H14         HGA3   0.090
ATOM H15         HGA3   0.090
ATOM H16         HGA3   0.090
ATOM H17         HGA3   0.090
ATOM H18         HGA3   0.090
ATOM H19         HGA3   0.090
ATOM H20         HGA4   0.150

BOND H14 C13
BOND H15 C13
BOND H18 C14
BOND H3 C4
BOND H5 C3
BOND C4 C3
BOND C4 C5
BOND C13 C7
BOND C13 H16
BOND C3 C2
BOND C7 C5
BOND C7 C8
BOND C5 C6
```

## SUPPORTING INFORMATION

```

BOND H7 C11
BOND C14 C9
BOND C14 H19
BOND C14 H17
BOND H10 C20
BOND H12 C19
BOND C9 C8
BOND C9 C10
BOND C20 C19
BOND C20 C16
BOND C19 C18
BOND C8 H20
BOND H9 C16
BOND C16 C15
BOND C11 C10
BOND C11 C12
BOND C18 H11
BOND C18 C17
BOND C10 H6
BOND C15 C17
BOND C15 C12
BOND C17 H13
BOND C12 H8
BOND C2 H4
BOND C2 C1
BOND C6 C1
BOND C6 H1
BOND C1 H2

```

END

BONDS

ANGLES

```

CG2DC1 CG2DC1 CG2R61 29.00 122.00
CG2R61 CG2DC1 CG331 48.00 113.00

```

DIHEDRALS

```

CG2DC1 CG2DC1 CG2R61 CG2R61 0.7500 2 180.00
CG2DC1 CG2DC1 CG2R61 CG2R61 0.1900 4 0.00
CG2DC2 CG2DC1 CG2DC1 CG2R61 0.103516 1 180
CG2DC2 CG2DC1 CG2DC1 CG2R61 8.776453 2 180
CG2R61 CG2DC1 CG2DC1 HGA4 6.016354 2 180
CG331 CG2DC1 CG2R61 CG2R61 1.268181 2 180
CG2R61 CG2DC1 CG331 HGA3 0.074396 3 180

```

### 1,4Me

```

RESI AIE 0.000
GROUP ! CHARGE
ATOM C1 CG2R61 -0.115
ATOM C2 CG2R61 -0.115
ATOM C3 CG2R61 -0.115
ATOM C4 CG2R61 -0.115
ATOM C5 CG2R61 -0.004
ATOM C6 CG2R61 -0.115
ATOM H1 HGR61 0.115
ATOM H2 HGR61 0.115
ATOM H3 HGR61 0.115
ATOM H4 HGR61 0.115

```

## SUPPORTING INFORMATION

|          |        |        |
|----------|--------|--------|
| ATOM H5  | HGR61  | 0.115  |
| ATOM C7  | CG2DC1 | -0.001 |
| ATOM C8  | CG2DC1 | -0.138 |
| ATOM C9  | CG2DC2 | -0.159 |
| ATOM C10 | CG2DC2 | -0.011 |
| ATOM C11 | CG2DC1 | -0.133 |
| ATOM C12 | CG2DC1 | -0.147 |
| ATOM C13 | CG331  | -0.270 |
| ATOM H6  | HGA4   | 0.150  |
| ATOM H7  | HGA4   | 0.150  |
| ATOM C14 | CG331  | -0.270 |
| ATOM H8  | HGA4   | 0.150  |
| ATOM C15 | CG2R61 | -0.007 |
| ATOM H9  | HGA4   | 0.150  |
| ATOM C16 | CG2R61 | -0.115 |
| ATOM C17 | CG2R61 | -0.115 |
| ATOM C18 | CG2R61 | -0.115 |
| ATOM C19 | CG2R61 | -0.115 |
| ATOM C20 | CG2R61 | -0.115 |
| ATOM H10 | HGR61  | 0.115  |
| ATOM H11 | HGR61  | 0.115  |
| ATOM H12 | HGR61  | 0.115  |
| ATOM H13 | HGR61  | 0.115  |
| ATOM H14 | HGR61  | 0.115  |
| ATOM H15 | HGA3   | 0.090  |
| ATOM H16 | HGA3   | 0.090  |
| ATOM H17 | HGA3   | 0.090  |
| ATOM H18 | HGA3   | 0.090  |
| ATOM H19 | HGA3   | 0.090  |
| ATOM H20 | HGA3   | 0.090  |

|          |     |
|----------|-----|
| BOND H3  | C4  |
| BOND H5  | C3  |
| BOND H15 | C13 |
| BOND H20 | C14 |
| BOND C4  | C3  |
| BOND C4  | C5  |
| BOND H11 | C20 |
| BOND H10 | C16 |
| BOND C3  | C2  |
| BOND H16 | C13 |
| BOND C20 | C16 |
| BOND C20 | C19 |
| BOND C16 | C15 |
| BOND C13 | C7  |
| BOND C13 | H17 |
| BOND H7  | C9  |
| BOND H8  | C11 |
| BOND C7  | C5  |
| BOND C7  | C8  |
| BOND H13 | C19 |
| BOND C19 | C18 |
| BOND C5  | C6  |
| BOND C9  | C8  |
| BOND C9  | C10 |
| BOND C8  | H6  |
| BOND C11 | C10 |
| BOND C11 | C12 |
| BOND C15 | C12 |
| BOND C15 | C17 |
| BOND C10 | C14 |

## SUPPORTING INFORMATION

BOND C2 H4  
 BOND C2 C1  
 BOND C12 H9  
 BOND C14 H18  
 BOND C14 H19  
 BOND C18 C17  
 BOND C18 H12  
 BOND C17 H14  
 BOND C6 C1  
 BOND C6 H1  
 BOND C1 H2

END  
 BONDS

### ANGLES

CG2DC1 CG2DC1 CG2R61 29.00 122.00  
 CG2R61 CG2DC1 CG331 48.00 113.00

### DIHEDRALS

|        |        |        |        |          |   |        |       |
|--------|--------|--------|--------|----------|---|--------|-------|
| CG2DC1 | CG2DC1 | CG2R61 | CG2R61 | 0.7500   | 2 | 180.00 |       |
| CG2DC1 | CG2DC1 | CG2R61 | CG2R61 | 0.1900   | 4 | 0.00   |       |
| CG2R61 | CG2DC1 | CG331  | HGA3   | 0.3000   | 3 | 180.00 |       |
| CG2DC2 | CG2DC1 | CG2DC1 | CG2R61 | 0.074976 |   |        | 1 180 |
| CG2DC2 | CG2DC1 | CG2DC1 | CG2R61 | 9.105853 |   |        | 2 180 |
| CG2R61 | CG2DC1 | CG2DC1 | HGA4   | 5.917803 |   |        | 2 180 |
| CG331  | CG2DC1 | CG2R61 | CG2R61 | 1.361484 |   |        | 2 180 |
| CG2R61 | CG2DC1 | CG331  | HGA3   | 0.121966 |   |        | 3 180 |

### 1,5Me

|          |        |          |
|----------|--------|----------|
| RESI AIE |        | 0.000    |
| GROUP    |        | ! CHARGE |
| ATOM C1  | CG2R61 | -0.115   |
| ATOM C2  | CG2R61 | -0.115   |
| ATOM C3  | CG2R61 | -0.115   |
| ATOM C4  | CG2R61 | -0.115   |
| ATOM C5  | CG2R61 | -0.004   |
| ATOM C6  | CG2R61 | -0.115   |
| ATOM H1  | HGR61  | 0.115    |
| ATOM H2  | HGR61  | 0.115    |
| ATOM H3  | HGR61  | 0.115    |
| ATOM H4  | HGR61  | 0.115    |
| ATOM H5  | HGR61  | 0.115    |
| ATOM C7  | CG2DC1 | -0.001   |
| ATOM C8  | CG2DC1 | -0.143   |
| ATOM C9  | CG2DC2 | -0.149   |
| ATOM C10 | CG2DC2 | -0.154   |
| ATOM C11 | CG2DC1 | 0.010    |
| ATOM C12 | CG2DC1 | -0.157   |
| ATOM H6  | HGA4   | 0.150    |
| ATOM H7  | HGA4   | 0.150    |
| ATOM C13 | CG2R61 | -0.002   |
| ATOM C14 | CG2R61 | -0.115   |
| ATOM C15 | CG2R61 | -0.115   |
| ATOM C16 | CG2R61 | -0.115   |
| ATOM C17 | CG2R61 | -0.115   |
| ATOM C18 | CG2R61 | -0.115   |
| ATOM H8  | HGR61  | 0.115    |
| ATOM H9  | HGR61  | 0.115    |
| ATOM H10 | HGR61  | 0.115    |

## SUPPORTING INFORMATION

|      |     |       |        |
|------|-----|-------|--------|
| ATOM | H11 | HGR61 | 0.115  |
| ATOM | H12 | HGR61 | 0.115  |
| ATOM | C19 | CG331 | -0.270 |
| ATOM | H13 | HGA4  | 0.150  |
| ATOM | H14 | HGA4  | 0.150  |
| ATOM | C20 | CG331 | -0.270 |
| ATOM | H15 | HGA3  | 0.090  |
| ATOM | H16 | HGA3  | 0.090  |
| ATOM | H17 | HGA3  | 0.090  |
| ATOM | H18 | HGA3  | 0.090  |
| ATOM | H19 | HGA3  | 0.090  |
| ATOM | H20 | HGA3  | 0.090  |

|      |     |     |
|------|-----|-----|
| BOND | H9  | C18 |
| BOND | H8  | C14 |
| BOND | H5  | C3  |
| BOND | H3  | C4  |
| BOND | C18 | C14 |
| BOND | C18 | C17 |
| BOND | C14 | C13 |
| BOND | H19 | C20 |
| BOND | C3  | C4  |
| BOND | C3  | C2  |
| BOND | C4  | C5  |
| BOND | H15 | C19 |
| BOND | H4  | C2  |
| BOND | H16 | C19 |
| BOND | C2  | C1  |
| BOND | H11 | C17 |
| BOND | C17 | C16 |
| BOND | C5  | C7  |
| BOND | C5  | C6  |
| BOND | C13 | C12 |
| BOND | C13 | C15 |
| BOND | C7  | C8  |
| BOND | C7  | C19 |
| BOND | C8  | H14 |
| BOND | C8  | C9  |
| BOND | C12 | H13 |
| BOND | C12 | C11 |
| BOND | H6  | C9  |
| BOND | C9  | C10 |
| BOND | H7  | C10 |
| BOND | C19 | H17 |
| BOND | C10 | C11 |
| BOND | C11 | C20 |
| BOND | C20 | H20 |
| BOND | C20 | H18 |
| BOND | C1  | C6  |
| BOND | C1  | H2  |
| BOND | C6  | H1  |
| BOND | C16 | C15 |
| BOND | C16 | H10 |
| BOND | C15 | H12 |

END

BONDS

ANGLES

|        |        |        |       |        |
|--------|--------|--------|-------|--------|
| CG2DC1 | CG2DC1 | CG2R61 | 29.00 | 122.00 |
|--------|--------|--------|-------|--------|

## SUPPORTING INFORMATION

CG2R61 CG2DC1 CG331 48.00 113.00

### DIHEDRALS

|        |        |        |        |          |   |        |     |
|--------|--------|--------|--------|----------|---|--------|-----|
| CG2DC1 | CG2DC1 | CG2R61 | CG2R61 | 0.7500   | 2 | 180.00 |     |
| CG2DC1 | CG2DC1 | CG2R61 | CG2R61 | 0.1900   | 4 | 0.00   |     |
| CG2DC2 | CG2DC1 | CG2DC1 | CG2R61 | 0.857374 |   | 1      | 180 |
| CG2DC2 | CG2DC1 | CG2DC1 | CG2R61 | 5.836502 |   | 2      | 180 |
| CG2R61 | CG2DC1 | CG2DC1 | CG331  | 0.589424 |   | 1      | 180 |
| CG2R61 | CG2DC1 | CG2DC1 | CG331  | 7.206005 |   | 2      | 180 |
| CG2R61 | CG2DC1 | CG2DC1 | HGA4   | 5.077691 |   | 2      | 180 |
| CG331  | CG2DC1 | CG2R61 | CG2R61 | 1.513733 |   | 2      | 180 |
| CG2R61 | CG2DC1 | CG331  | HGA3   | 0.214945 |   | 3      | 180 |

### 2,3Me

|          |        |          |
|----------|--------|----------|
| RESI AIE |        | 0.000    |
| GROUP    |        | ! CHARGE |
| ATOM C1  | CG2R61 | -0.115   |
| ATOM C2  | CG2R61 | -0.115   |
| ATOM C3  | CG2R61 | -0.115   |
| ATOM C4  | CG2R61 | -0.115   |
| ATOM C5  | CG2R61 | -0.002   |
| ATOM C6  | CG2R61 | -0.115   |
| ATOM H1  | HGR61  | 0.115    |
| ATOM H2  | HGR61  | 0.115    |
| ATOM H3  | HGR61  | 0.115    |
| ATOM H4  | HGR61  | 0.115    |
| ATOM H5  | HGR61  | 0.115    |
| ATOM C7  | CG2DC1 | -0.154   |
| ATOM C8  | CG2DC1 | 0.013    |
| ATOM C9  | CG2DC2 | -0.008   |
| ATOM C10 | CG2DC2 | -0.161   |
| ATOM C11 | CG2DC1 | -0.131   |
| ATOM C12 | CG2DC1 | -0.150   |
| ATOM C13 | CG331  | -0.270   |
| ATOM C14 | CG331  | -0.270   |
| ATOM H6  | HGA4   | 0.150    |
| ATOM H7  | HGA4   | 0.150    |
| ATOM C15 | CG2R61 | -0.007   |
| ATOM C16 | CG2R61 | -0.115   |
| ATOM C17 | CG2R61 | -0.115   |
| ATOM C18 | CG2R61 | -0.115   |
| ATOM C19 | CG2R61 | -0.115   |
| ATOM C20 | CG2R61 | -0.115   |
| ATOM H8  | HGR61  | 0.115    |
| ATOM H9  | HGR61  | 0.115    |
| ATOM H10 | HGR61  | 0.115    |
| ATOM H11 | HGR61  | 0.115    |
| ATOM H12 | HGR61  | 0.115    |
| ATOM H13 | HGA4   | 0.150    |
| ATOM H14 | HGA4   | 0.150    |
| ATOM H15 | HGA3   | 0.090    |
| ATOM H16 | HGA3   | 0.090    |
| ATOM H17 | HGA3   | 0.090    |
| ATOM H18 | HGA3   | 0.090    |
| ATOM H19 | HGA3   | 0.090    |
| ATOM H20 | HGA3   | 0.090    |

BOND H3 C4  
BOND H5 C3



## SUPPORTING INFORMATION

BOND H19 C14  
BOND C3 C4  
BOND C3 C2  
BOND C4 C5  
BOND H9 C20  
BOND H8 C16  
BOND C20 C16  
BOND C20 C19  
BOND H17 C13  
BOND C16 C15  
BOND H13 C7  
BOND C14 H20  
BOND C14 C9  
BOND C14 H18  
BOND H11 C19  
BOND H4 C2  
BOND C2 C1  
BOND H7 C11  
BOND C5 C7  
BOND C5 C6  
BOND C19 C18  
BOND C7 C8  
BOND C15 C12  
BOND C15 C17  
BOND C11 C12  
BOND C11 C10  
BOND C9 C10  
BOND C9 C8  
BOND C12 H14  
BOND C10 H6  
BOND C8 C13  
BOND C18 C17  
BOND C18 H10  
BOND C17 H12  
BOND C13 H15  
BOND C13 H16  
BOND C6 C1  
BOND C6 H1  
BOND C1 H2

END

BONDS

ANGLES

CG2DC1 CG2DC1 CG2R61 29.00 122.00

DIHEDRALS

|        |        |        |        |           |   |        |  |
|--------|--------|--------|--------|-----------|---|--------|--|
| CG2DC1 | CG2DC1 | CG2R61 | CG2R61 | 0.7500    | 2 | 180.00 |  |
| CG2DC1 | CG2DC1 | CG2R61 | CG2R61 | 0.1900    | 4 | 0.00   |  |
| CG2DC2 | CG2DC1 | CG2DC1 | CG2R61 | 0.096978  | 1 | 180    |  |
| CG2DC2 | CG2DC1 | CG2DC1 | CG2R61 | 11.415094 | 2 | 180    |  |
| CG2R61 | CG2DC1 | CG2DC1 | CG331  | 0.193584  | 1 | 180    |  |
| CG2R61 | CG2DC1 | CG2DC1 | CG331  | 5.531836  | 2 | 180    |  |
| CG2R61 | CG2DC1 | CG2DC1 | HGA4   | 6.61659   | 2 | 180    |  |
| CG331  | CG2DC1 | CG2DC2 | CG331  | 0.693951  | 1 | 180    |  |
| CG331  | CG2DC1 | CG2DC2 | CG331  | 1.317678  | 2 | 180    |  |

**2,4Me**

RESI AIE 0.000

## SUPPORTING INFORMATION

| GROUP    |        | ! CHARGE |
|----------|--------|----------|
| ATOM C1  | CG2R61 | -0.115   |
| ATOM C2  | CG2R61 | -0.115   |
| ATOM C3  | CG2R61 | -0.115   |
| ATOM C4  | CG2R61 | -0.115   |
| ATOM C5  | CG2R61 | -0.002   |
| ATOM C6  | CG2R61 | -0.115   |
| ATOM H1  | HGR61  | 0.115    |
| ATOM H2  | HGR61  | 0.115    |
| ATOM H3  | HGR61  | 0.115    |
| ATOM H4  | HGR61  | 0.115    |
| ATOM H5  | HGR61  | 0.115    |
| ATOM C7  | CG2DC1 | -0.157   |
| ATOM C8  | CG2DC1 | 0.015    |
| ATOM C9  | CG2DC2 | -0.161   |
| ATOM C10 | CG2DC2 | -0.008   |
| ATOM C11 | CG2DC1 | -0.133   |
| ATOM C12 | CG2DC1 | -0.147   |
| ATOM H6  | HGA4   | 0.150    |
| ATOM C13 | CG331  | -0.270   |
| ATOM C14 | CG2R61 | -0.007   |
| ATOM C15 | CG2R61 | -0.115   |
| ATOM C16 | CG2R61 | -0.115   |
| ATOM C17 | CG2R61 | -0.115   |
| ATOM C18 | CG2R61 | -0.115   |
| ATOM C19 | CG2R61 | -0.115   |
| ATOM H7  | HGR61  | 0.115    |
| ATOM H8  | HGR61  | 0.115    |
| ATOM H9  | HGR61  | 0.115    |
| ATOM H10 | HGR61  | 0.115    |
| ATOM H11 | HGR61  | 0.115    |
| ATOM H12 | HGA4   | 0.150    |
| ATOM H13 | HGA4   | 0.150    |
| ATOM C20 | CG331  | -0.270   |
| ATOM H14 | HGA4   | 0.150    |
| ATOM H15 | HGA3   | 0.090    |
| ATOM H16 | HGA3   | 0.090    |
| ATOM H17 | HGA3   | 0.090    |
| ATOM H18 | HGA3   | 0.090    |
| ATOM H19 | HGA3   | 0.090    |
| ATOM H20 | HGA3   | 0.090    |

|          |     |
|----------|-----|
| BOND H3  | C4  |
| BOND H5  | C3  |
| BOND H20 | C13 |
| BOND C4  | C3  |
| BOND C4  | C5  |
| BOND C3  | C2  |
| BOND H12 | C7  |
| BOND C7  | C5  |
| BOND C7  | C8  |
| BOND H18 | C13 |
| BOND C5  | C6  |
| BOND C2  | H4  |
| BOND C2  | C1  |
| BOND H10 | C18 |
| BOND H8  | C19 |
| BOND C18 | C19 |
| BOND C18 | C17 |
| BOND C19 | C15 |
| BOND H9  | C17 |

## SUPPORTING INFORMATION

BOND C17 C16  
BOND C15 H7  
BOND C15 C14  
BOND H17 C20  
BOND C16 C14  
BOND C16 H11  
BOND C14 C12  
BOND H14 C11  
BOND C12 C11  
BOND C12 H13  
BOND C11 C10  
BOND C13 C10  
BOND C13 H19  
BOND H6 C9  
BOND C10 C9  
BOND C9 C8  
BOND C8 C20  
BOND C6 C1  
BOND C6 H1  
BOND C1 H2  
BOND C20 H15  
BOND C20 H16

END

BONDS

ANGLES

CG2DC1 CG2DC1 CG2R61 29.00 122.00

DIHEDRALS

|        |        |        |        |           |   |        |  |
|--------|--------|--------|--------|-----------|---|--------|--|
| CG2DC1 | CG2DC1 | CG2R61 | CG2R61 | 0.7500    | 2 | 180.00 |  |
| CG2DC1 | CG2DC1 | CG2R61 | CG2R61 | 0.1900    | 4 | 0.00   |  |
| CG2DC2 | CG2DC1 | CG2DC1 | CG2R61 | 0.094644  | 1 | 180    |  |
| CG2DC2 | CG2DC1 | CG2DC1 | CG2R61 | 9.162901  | 2 | 180    |  |
| CG2R61 | CG2DC1 | CG2DC1 | CG331  | 1.244941  | 1 | 180    |  |
| CG2R61 | CG2DC1 | CG2DC1 | CG331  | 10.107544 | 2 | 180    |  |
| CG2R61 | CG2DC1 | CG2DC1 | HGA4   | 6.709147  | 2 | 180    |  |

### 2,5Me

|          |        |          |
|----------|--------|----------|
| RESI AIE |        | 0.000    |
| GROUP    |        | ! CHARGE |
| ATOM C1  | CG2R61 | -0.115   |
| ATOM C2  | CG2R61 | -0.115   |
| ATOM C3  | CG2R61 | -0.115   |
| ATOM C4  | CG2R61 | -0.115   |
| ATOM C5  | CG2R61 | -0.002   |
| ATOM C6  | CG2R61 | -0.115   |
| ATOM H1  | HGR61  | 0.115    |
| ATOM H2  | HGR61  | 0.115    |
| ATOM H3  | HGR61  | 0.115    |
| ATOM H4  | HGR61  | 0.115    |
| ATOM H5  | HGR61  | 0.115    |
| ATOM C7  | CG2DC1 | -0.157   |
| ATOM C8  | CG2DC1 | 0.010    |
| ATOM C9  | CG2DC2 | -0.151   |
| ATOM C10 | CG2DC2 | -0.151   |
| ATOM C11 | CG2DC1 | 0.010    |
| ATOM C12 | CG2DC1 | -0.157   |
| ATOM H6  | HGA4   | 0.150    |

## SUPPORTING INFORMATION

|          |        |        |
|----------|--------|--------|
| ATOM H7  | HGA4   | 0.150  |
| ATOM C13 | CG2R61 | -0.002 |
| ATOM C14 | CG2R61 | -0.115 |
| ATOM C15 | CG2R61 | -0.115 |
| ATOM C16 | CG2R61 | -0.115 |
| ATOM C17 | CG2R61 | -0.115 |
| ATOM C18 | CG2R61 | -0.115 |
| ATOM H8  | HGR61  | 0.115  |
| ATOM H9  | HGR61  | 0.115  |
| ATOM H10 | HGR61  | 0.115  |
| ATOM H11 | HGR61  | 0.115  |
| ATOM H12 | HGR61  | 0.115  |
| ATOM H13 | HGA4   | 0.150  |
| ATOM H14 | HGA4   | 0.150  |
| ATOM C19 | CG331  | -0.270 |
| ATOM C20 | CG331  | -0.270 |
| ATOM H15 | HGA3   | 0.090  |
| ATOM H16 | HGA3   | 0.090  |
| ATOM H17 | HGA3   | 0.090  |
| ATOM H18 | HGA3   | 0.090  |
| ATOM H19 | HGA3   | 0.090  |
| ATOM H20 | HGA3   | 0.090  |

|          |     |
|----------|-----|
| BOND H9  | C18 |
| BOND H5  | C3  |
| BOND H8  | C14 |
| BOND H3  | C4  |
| BOND C18 | C14 |
| BOND C18 | C17 |
| BOND C3  | C4  |
| BOND C3  | C2  |
| BOND C14 | C13 |
| BOND C4  | C5  |
| BOND H19 | C20 |
| BOND H17 | C19 |
| BOND H11 | C17 |
| BOND H4  | C2  |
| BOND C17 | C16 |
| BOND C2  | C1  |
| BOND C5  | C7  |
| BOND C5  | C6  |
| BOND C13 | C12 |
| BOND C13 | C15 |
| BOND C7  | H13 |
| BOND C7  | C8  |
| BOND C12 | H14 |
| BOND C12 | C11 |
| BOND H6  | C9  |
| BOND C11 | C10 |
| BOND C11 | C20 |
| BOND C8  | C9  |
| BOND C8  | C19 |
| BOND C9  | C10 |
| BOND H7  | C10 |
| BOND C20 | H20 |
| BOND C20 | H18 |
| BOND C19 | H15 |
| BOND C19 | H16 |
| BOND C1  | C6  |
| BOND C1  | H2  |
| BOND C16 | C15 |

## SUPPORTING INFORMATION

BOND C16 H10  
BOND C6 H1  
BOND C15 H12

END

BONDS

ANGLES

CG2DC1 CG2DC1 CG2R61 29.00 122.00

DIHEDRALS

|        |        |        |        |           |   |        |  |
|--------|--------|--------|--------|-----------|---|--------|--|
| CG2DC1 | CG2DC1 | CG2R61 | CG2R61 | 0.7500    | 2 | 180.00 |  |
| CG2DC1 | CG2DC1 | CG2R61 | CG2R61 | 0.1900    | 4 | 0.00   |  |
| CG2DC2 | CG2DC1 | CG2DC1 | CG2R61 | 0.04648   | 1 | 180    |  |
| CG2DC2 | CG2DC1 | CG2DC1 | CG2R61 | 12.977052 | 2 | 180    |  |
| CG2R61 | CG2DC1 | CG2DC1 | CG331  | 0.7836    | 1 | 180    |  |
| CG2R61 | CG2DC1 | CG2DC1 | CG331  | 7.926638  | 2 | 180    |  |

### 3,4Me

|          |        |          |
|----------|--------|----------|
| RESI AIE |        | 0.000    |
| GROUP    |        | ! CHARGE |
| ATOM C1  | CG2R61 | -0.115   |
| ATOM C2  | CG2R61 | -0.115   |
| ATOM C3  | CG2R61 | -0.115   |
| ATOM C4  | CG2R61 | -0.115   |
| ATOM C5  | CG2R61 | -0.007   |
| ATOM C6  | CG2R61 | -0.115   |
| ATOM H1  | HGR61  | 0.115    |
| ATOM H2  | HGR61  | 0.115    |
| ATOM H3  | HGR61  | 0.115    |
| ATOM H4  | HGR61  | 0.115    |
| ATOM H5  | HGR61  | 0.115    |
| ATOM C7  | CG2DC1 | -0.147   |
| ATOM C8  | CG2DC1 | -0.128   |
| ATOM C9  | CG2DC2 | -0.017   |
| ATOM C10 | CG2DC2 | -0.017   |
| ATOM C11 | CG2DC1 | -0.128   |
| ATOM C12 | CG2DC1 | -0.147   |
| ATOM C13 | CG331  | -0.271   |
| ATOM C14 | CG331  | -0.271   |
| ATOM C15 | CG2R61 | -0.007   |
| ATOM C16 | CG2R61 | -0.115   |
| ATOM C17 | CG2R61 | -0.115   |
| ATOM C18 | CG2R61 | -0.115   |
| ATOM C19 | CG2R61 | -0.115   |
| ATOM C20 | CG2R61 | -0.115   |
| ATOM H6  | HGR61  | 0.115    |
| ATOM H7  | HGR61  | 0.115    |
| ATOM H8  | HGR61  | 0.115    |
| ATOM H9  | HGR61  | 0.115    |
| ATOM H10 | HGR61  | 0.115    |
| ATOM H11 | HGA4   | 0.150    |
| ATOM H12 | HGA4   | 0.150    |
| ATOM H13 | HGA4   | 0.150    |
| ATOM H14 | HGA4   | 0.150    |
| ATOM H15 | HGA3   | 0.090    |
| ATOM H16 | HGA3   | 0.090    |
| ATOM H17 | HGA3   | 0.090    |
| ATOM H18 | HGA3   | 0.090    |

## SUPPORTING INFORMATION

ATOM H19     HGA3     0.090  
 ATOM H20     HGA3     0.090

BOND H16 C13  
 BOND H20 C14  
 BOND H3 C4  
 BOND H8 C18  
 BOND H5 C3  
 BOND H17 C13  
 BOND C13 C9  
 BOND C13 H15  
 BOND H11 C7  
 BOND C4 C3  
 BOND C4 C5  
 BOND H10 C17  
 BOND C18 C17  
 BOND C18 C19  
 BOND C3 C2  
 BOND H14 C11  
 BOND H9 C19  
 BOND C7 C5  
 BOND C7 C8  
 BOND C17 C15  
 BOND C5 C6  
 BOND C19 C20  
 BOND C9 C8  
 BOND C9 C10  
 BOND C8 H13  
 BOND C11 C10  
 BOND C11 C12  
 BOND C2 H4  
 BOND C2 C1  
 BOND C15 C12  
 BOND C15 C16  
 BOND C10 C14  
 BOND C6 C1  
 BOND C6 H1  
 BOND C20 C16  
 BOND C20 H7  
 BOND C12 H12  
 BOND C1 H2  
 BOND C16 H6  
 BOND C14 H18  
 BOND C14 H19

END

BONDS

ANGLES

CG2DC1 CG2DC1 CG2R61     29.00     122.00

DIHEDRALS

|        |        |        |        |          |   |        |  |
|--------|--------|--------|--------|----------|---|--------|--|
| CG2DC1 | CG2DC1 | CG2R61 | CG2R61 | 0.7500   | 2 | 180.00 |  |
| CG2DC1 | CG2DC1 | CG2R61 | CG2R61 | 0.1900   | 4 | 0.00   |  |
| CG331  | CG2DC2 | CG2DC2 | CG331  | 10.0000  | 2 | 180.00 |  |
| CG2DC2 | CG2DC1 | CG2DC1 | CG2R61 | 0.08265  | 1 | 180    |  |
| CG2DC2 | CG2DC1 | CG2DC1 | CG2R61 | 9.758027 | 2 | 180    |  |
| CG2R61 | CG2DC1 | CG2DC1 | HGA4   | 6.169531 | 2 | 180    |  |

## SUPPORTING INFORMATION

### 1Me

```
RESI AIE          0.000
GROUP            ! CHARGE
ATOM H1          HGR61   0.115
ATOM C1          CG2R61 -0.115
ATOM C2          CG2R61 -0.115
ATOM H2          HGR61   0.115
ATOM C3          CG2R61 -0.115
ATOM H3          HGR61   0.115
ATOM C4          CG2R61 -0.115
ATOM H4          HGR61   0.115
ATOM C5          CG2R61 -0.115
ATOM H5          HGR61   0.115
ATOM C6          CG2R61 -0.004
ATOM C7          CG2DC1 -0.001
ATOM H6          HGR61   0.115
ATOM C8          CG2R61 -0.115
ATOM C9          CG2R61 -0.115
ATOM H7          HGR61   0.115
ATOM C10         CG2R61 -0.007
ATOM C11         CG2R61 -0.115
ATOM H8          HGR61   0.115
ATOM C12         CG2R61 -0.115
ATOM H9          HGR61   0.115
ATOM C13         CG2R61 -0.115
ATOM H10         HGR61   0.115
ATOM C14         CG2DC1 -0.143
ATOM C15         CG2DC2 -0.152
ATOM C16         CG2DC2 -0.157
ATOM C17         CG2DC1 -0.136
ATOM C18         CG2DC1 -0.150
ATOM C19         CG331  -0.270
ATOM H11         HGA4    0.150
ATOM H12         HGA4    0.150
ATOM H13         HGA4    0.150
ATOM H14         HGA4    0.150
ATOM H15         HGA4    0.150
ATOM H16         HGA3    0.090
ATOM H17         HGA3    0.090
ATOM H18         HGA3    0.090

BOND H18 C19
BOND H5 C5
BOND H4 C4
BOND H16 C19
BOND C5 C4
BOND C5 C6
BOND H6 C8
BOND C4 C3
BOND H7 C9
BOND C19 C7
BOND C19 H17
BOND H12 C15
BOND C8 C9
BOND C8 C13
BOND C9 C10
BOND H14 C17
BOND C7 C6
BOND C7 C14
```

## SUPPORTING INFORMATION

BOND C15 C14  
BOND C15 C16  
BOND C6 C1  
BOND C14 H11  
BOND C17 C16  
BOND C17 C18  
BOND C16 H13  
BOND H10 C13  
BOND C13 C12  
BOND C10 C18  
BOND C10 C11  
BOND C3 H3  
BOND C3 C2  
BOND C18 H15  
BOND C12 C11  
BOND C12 H9  
BOND C11 H8  
BOND C1 C2  
BOND C1 H1  
BOND C2 H2

END

BONDS

ANGLES

CG2DC1 CG2DC1 CG2R61 29.00 122.00  
CG2R61 CG2DC1 CG331 48.00 113.00

DIHEDRALS

CG2DC1 CG2DC1 CG2R61 CG2R61 0.7500 2 180.00  
CG2DC1 CG2DC1 CG2R61 CG2R61 0.1900 4 0.00  
CG2DC2 CG2DC1 CG2DC1 CG2R61 0.161071 1 180  
CG2DC2 CG2DC1 CG2DC1 CG2R61 8.51945 2 180  
CG2R61 CG2DC1 CG2DC1 HGA4 4.73837 2 180  
CG331 CG2DC1 CG2R61 CG2R61 1.590478 2 180  
CG2R61 CG2DC1 CG331 HGA3 0.461611 3 60

### 2Me

RESI AIE 0.000  
GROUP ! CHARGE  
ATOM H1 HGR61 0.115  
ATOM C1 CG2R61 -0.115  
ATOM C2 CG2R61 -0.115  
ATOM H2 HGR61 0.115  
ATOM C3 CG2R61 -0.002  
ATOM C4 CG2DC1 -0.157  
ATOM C5 CG2R61 -0.115  
ATOM H3 HGR61 0.115  
ATOM C6 CG2R61 -0.115  
ATOM H4 HGR61 0.115  
ATOM C7 CG2R61 -0.115  
ATOM H5 HGR61 0.115  
ATOM H6 HGR61 0.115  
ATOM C8 CG2R61 -0.115  
ATOM C9 CG2R61 -0.115  
ATOM H7 HGR61 0.115  
ATOM C10 CG2R61 -0.115  
ATOM H8 HGR61 0.115



## SUPPORTING INFORMATION

|      |     |        |        |
|------|-----|--------|--------|
| ATOM | C11 | CG2R61 | -0.115 |
| ATOM | H9  | HGR61  | 0.115  |
| ATOM | C12 | CG2R61 | -0.115 |
| ATOM | H10 | HGR61  | 0.115  |
| ATOM | C13 | CG2R61 | -0.007 |
| ATOM | C14 | CG2DC1 | 0.010  |
| ATOM | C15 | CG2DC2 | -0.154 |
| ATOM | C16 | CG2DC2 | -0.154 |
| ATOM | C17 | CG2DC1 | -0.136 |
| ATOM | C18 | CG2DC1 | -0.150 |
| ATOM | H11 | HGA4   | 0.150  |
| ATOM | C19 | CG331  | -0.270 |
| ATOM | H12 | HGA4   | 0.150  |
| ATOM | H13 | HGA4   | 0.150  |
| ATOM | H14 | HGA4   | 0.150  |
| ATOM | H15 | HGA4   | 0.150  |
| ATOM | H16 | HGA3   | 0.090  |
| ATOM | H17 | HGA3   | 0.090  |
| ATOM | H18 | HGA3   | 0.090  |

|      |     |     |
|------|-----|-----|
| BOND | H17 | C19 |
| BOND | H1  | C1  |
| BOND | H2  | C2  |
| BOND | H18 | C19 |
| BOND | C1  | C2  |
| BOND | C1  | C7  |
| BOND | C2  | C3  |
| BOND | H10 | C12 |
| BOND | C19 | C14 |
| BOND | C19 | H16 |
| BOND | H9  | C11 |
| BOND | H13 | C16 |
| BOND | C12 | C11 |
| BOND | C12 | C13 |
| BOND | H15 | C18 |
| BOND | C11 | C10 |
| BOND | C16 | C15 |
| BOND | C16 | C17 |
| BOND | C14 | C15 |
| BOND | C14 | C4  |
| BOND | C18 | C17 |
| BOND | C18 | C13 |
| BOND | C15 | H12 |
| BOND | C17 | H14 |
| BOND | C13 | C8  |
| BOND | H5  | C7  |
| BOND | C7  | C6  |
| BOND | C4  | C3  |
| BOND | C4  | H11 |
| BOND | C3  | C5  |
| BOND | C10 | H8  |
| BOND | C10 | C9  |
| BOND | C8  | C9  |
| BOND | C8  | H6  |
| BOND | C9  | H7  |
| BOND | C6  | C5  |
| BOND | C6  | H4  |
| BOND | C5  | H3  |

END

## SUPPORTING INFORMATION

### BONDS

### ANGLES

CG2DC1 CG2DC1 CG2R61 29.00 122.00

### DIHEDRALS

|        |        |        |        |          |   |        |     |
|--------|--------|--------|--------|----------|---|--------|-----|
| CG2DC1 | CG2DC1 | CG2R61 | CG2R61 | 0.7500   | 2 | 180.00 |     |
| CG2DC1 | CG2DC1 | CG2R61 | CG2R61 | 0.1900   | 4 | 0.00   |     |
| CG2DC2 | CG2DC1 | CG2DC1 | CG2R61 | 1.318489 |   |        | 180 |
| CG2DC2 | CG2DC1 | CG2DC1 | CG2R61 | 3.914232 |   |        | 180 |
| CG2R61 | CG2DC1 | CG2DC1 | CG331  | 0.126094 |   |        | 180 |
| CG2R61 | CG2DC1 | CG2DC1 | CG331  | 5.227654 |   |        | 180 |
| CG2R61 | CG2DC1 | CG2DC1 | HGA4   | 5.810909 |   |        | 180 |

### 3Me

|       |     |        |        |
|-------|-----|--------|--------|
| RESI  | AIE |        | 0.000  |
| GROUP |     | !      | CHARGE |
| ATOM  | H1  | HGR61  | 0.115  |
| ATOM  | C1  | CG2R61 | -0.115 |
| ATOM  | C2  | CG2R61 | -0.115 |
| ATOM  | H2  | HGR61  | 0.115  |
| ATOM  | C3  | CG2R61 | -0.007 |
| ATOM  | C4  | CG2DC1 | -0.150 |
| ATOM  | C5  | CG2R61 | -0.115 |
| ATOM  | H3  | HGR61  | 0.115  |
| ATOM  | C6  | CG2R61 | -0.115 |
| ATOM  | H4  | HGR61  | 0.115  |
| ATOM  | C7  | CG2R61 | -0.115 |
| ATOM  | H5  | HGR61  | 0.115  |
| ATOM  | C8  | CG2DC1 | -0.131 |
| ATOM  | C9  | CG2DC2 | -0.164 |
| ATOM  | C10 | CG2DC2 | -0.011 |
| ATOM  | C11 | CG2DC1 | -0.133 |
| ATOM  | C12 | CG2DC1 | -0.147 |
| ATOM  | C13 | CG2R61 | -0.007 |
| ATOM  | C14 | CG2R61 | -0.115 |
| ATOM  | C15 | CG2R61 | -0.115 |
| ATOM  | C16 | CG2R61 | -0.115 |
| ATOM  | C17 | CG2R61 | -0.115 |
| ATOM  | C18 | CG2R61 | -0.115 |
| ATOM  | H6  | HGA4   | 0.150  |
| ATOM  | H7  | HGA4   | 0.150  |
| ATOM  | H8  | HGA4   | 0.150  |
| ATOM  | C19 | CG331  | -0.270 |
| ATOM  | H9  | HGA4   | 0.150  |
| ATOM  | H10 | HGA4   | 0.150  |
| ATOM  | H11 | HGR61  | 0.115  |
| ATOM  | H12 | HGR61  | 0.115  |
| ATOM  | H13 | HGR61  | 0.115  |
| ATOM  | H14 | HGR61  | 0.115  |
| ATOM  | H15 | HGR61  | 0.115  |
| ATOM  | H16 | HGA3   | 0.090  |
| ATOM  | H17 | HGA3   | 0.090  |
| ATOM  | H18 | HGA3   | 0.090  |

|      |     |     |
|------|-----|-----|
| BOND | H18 | C19 |
| BOND | H12 | C15 |
| BOND | H13 | C16 |
| BOND | H4  | C6  |
| BOND | H3  | C5  |

## SUPPORTING INFORMATION

BOND C15 C16  
BOND C15 C13  
BOND C16 C17  
BOND C6 C5  
BOND C6 C7  
BOND C5 C3  
BOND H5 C7  
BOND C13 C12  
BOND C13 C14  
BOND C7 C1  
BOND C12 H10  
BOND C12 C11  
BOND C17 H14  
BOND C17 C18  
BOND H16 C19  
BOND H7 C8  
BOND C3 C4  
BOND C3 C2  
BOND C11 C10  
BOND C11 H9  
BOND C10 C19  
BOND C10 C9  
BOND C8 C9  
BOND C8 C4  
BOND C19 H17  
BOND H8 C9  
BOND C4 H6  
BOND C1 C2  
BOND C1 H1  
BOND C2 H2  
BOND C14 C18  
BOND C14 H11  
BOND C18 H15

END

BONDS

ANGLES

CG2DC1 CG2DC1 CG2R61 29.00 122.00

DIHEDRALS

|        |        |        |        |          |   |        |  |  |
|--------|--------|--------|--------|----------|---|--------|--|--|
| CG2DC1 | CG2DC1 | CG2R61 | CG2R61 | 0.7500   | 2 | 180.00 |  |  |
| CG2DC1 | CG2DC1 | CG2R61 | CG2R61 | 0.1900   | 4 | 0.00   |  |  |
| CG2DC2 | CG2DC1 | CG2DC1 | CG2R61 | 0.08811  | 1 | 180    |  |  |
| CG2DC2 | CG2DC1 | CG2DC1 | CG2R61 | 8.721226 | 2 | 180    |  |  |
| CG2R61 | CG2DC1 | CG2DC1 | HGA4   | 5.688978 | 2 | 180    |  |  |
